# Supplementary material
Source: publisher figshare collection journal article supplement (https://karger.figshare.com/ndownloader/files/23818916)
Supplement: Supplementary file 1 [file 23818916]

**SUPPLEMENTARY TABLES**

**Supplementary Table 1. Temporal evolution of breast cancer hospital production in Portugal between 2007 and 2014, Source Grupos de Diagnóstico Homogéneos [GDH]** 22,23 **and Total number of hospital discharges of female breast cancer patients in Portugal per 100,000 inhabitants (adapted from Eurostat 2016**46 **c) and Average length of hospitalization (days) in Portugal between 2002 and 2014, Source Eurostat**45

|  | **2002** | **2003** | **2004** | **2005** | **2006** | **2007** | **2008** | **2009** | **2010** | **2011** | **2012** | **2013** | **2014** | **2015** |
| --- | --- | --- | --- | --- | --- | --- | --- | --- | --- | --- | --- | --- | --- | --- |
| **Hospitalizations per 105 inhabitants**46 | 111.1 | 109.4 | 111.8 | 111.7 | 115.5 | 117.2 | 122.9 | 124.8 | 126.8 | 136.0 | 134.8 | 140.5 | 132.5 | 134.4 |
| **Hospital production (including ambulatory)** 22,23 | NR | NR | NR | NR | NR | 6229 | 6721 | 6547 | 7329 | 7843 | 7784 | 8114 | 7633 (preliminar) | NR |
| **Average length of hospitalization (days)** 45 | NR | NR | NR | 6,8 | 6,7 | 6,2 | 5,7 | 5,7 | 4,9 | NR | NR | NR | NR | 5.1 |

**Supplementary Table 2. Number of hospitalizations, deaths and lethality rate in female breast cancer patients (according to ICD 9:174) by NUTS II (1999) on 2000, 2004, 2008 and the 2000-2008 variation (from Machado et al**24**)**

|  | **Number of Hospitalizations** | | | **Number of Deaths** | | | **Lethality (%)** | | |
| --- | --- | --- | --- | --- | --- | --- | --- | --- | --- |
|  | **2000** | **2004** | **2008** | **2000** | **2004** | **2008** | **2000** | **2004** | **2008** |
| **Norte** | 1140 | 1364 | 2172 | 74 | 67 | 74 | 6.5 | 4.9 | 3.4 |
| **Centro** | 1047 | 1294 | 1149 | 69 | 100 | 70 | 6.6 | 7.7 | 6.1 |
| **LVT** | 2105 | 2248 | 2677 | 225 | 177 | 165 | 10.7 | 7.9 | 6,2 |
| **Alentejo** | 315 | 363 | 376 | 40 | 23 | 28 | 12.7 | 6.3 | 7.4 |
| **Algarve** | 192 | 241 | 314 | 17 | 11 | 16 | 8.9 | 4.6 | 5.1 |
| **Portugal** | 5353 | 6426 | 7112 | 464 | 427 | 373 | 8.7 | 6,6 | 5.2 |

**Supplementary Table 3. Temporal evolution of breast cancer (BC) hospital admission rate (HAR) in mainland Portugal between 2002 and 2016, for all, primary and secondary BC admission code, per 105 inhabitants**

|  | **2002** | **2003** | **2004** | **2005** | **2006** | **2007** | **2008** | **2009** | **2010** | **2011** | **2012** | **2013** | **2014** | **2015** | **2016** | **Total** |
| --- | --- | --- | --- | --- | --- | --- | --- | --- | --- | --- | --- | --- | --- | --- | --- | --- |
| All admission codes | 125.73 | 126.03 | 125.76 | 119.87 | 121.63 | 124.72 | 148.47 | 159.66 | 163.13 | 176.50 | 177.89 | 187.80 | 181.83 | 186.97 | 173.10 | 153.34 |
| Primary admission code | 98.67 | 99.56 | 99.07 | 96.29 | 98.53 | 97.98 | 117.51 | 125.93 | 124.65 | 137.72 | 138.31 | 143.97 | 136.68 | 138.75 | 126.34 | 118.72 |
| Secondary admission code | 45.95 | 41.71 | 43.11 | 39.48 | 38.60 | 40.59 | 41.18 | 37.04 | 39.42 | 39.42 | 40.41 | 44.76 | 46.36 | 49.49 | 48.11 | 42.36 |
| All Admissions/hour | 0.74 | 0.74 | 0.74 | 0.71 | 0.72 | 0.74 | 0.89 | 0.95 | 0.98 | 1.06 | 1.06 | 1.12 | 1.08 | 1.11 | 1.02 | 0.91 |
